# Supplementary material
Source: PubMed Central journal article supplement (PMC5285474)
Supplement: NIHMS831183-supplement-6.pdf [file NIHMS831183-supplement-6.pdf]

Figure 2a

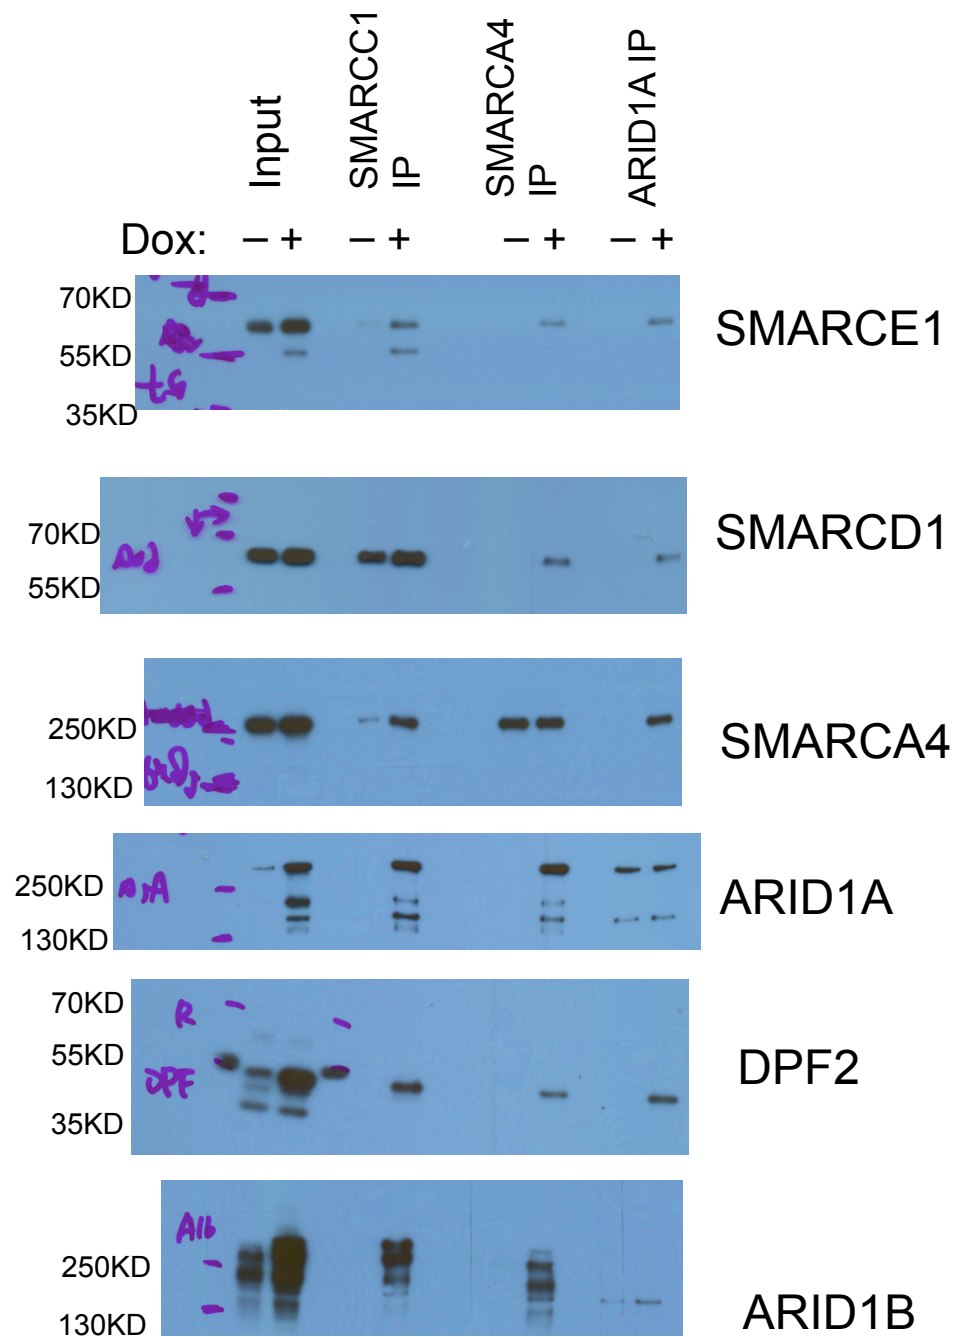

Figure 2a

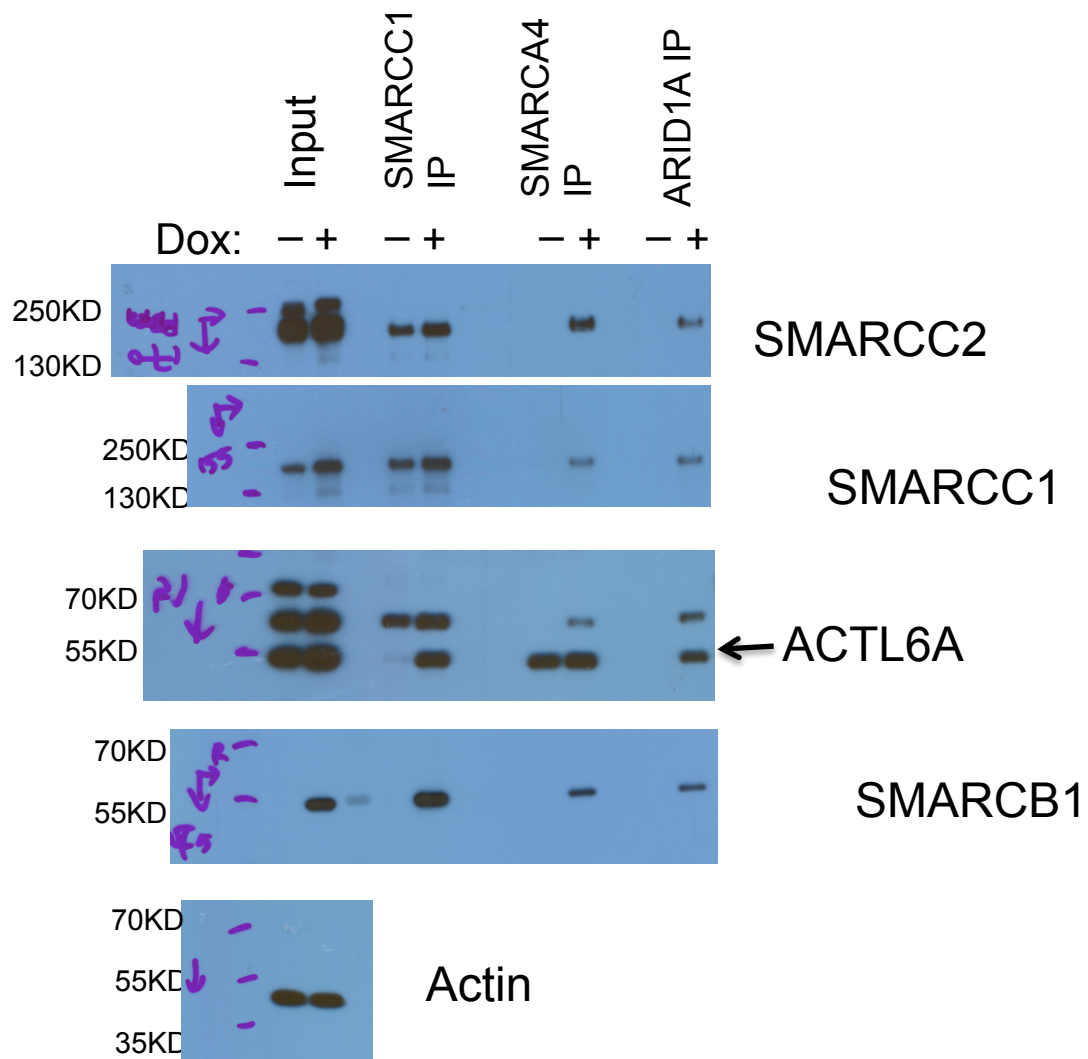

Figure 2b

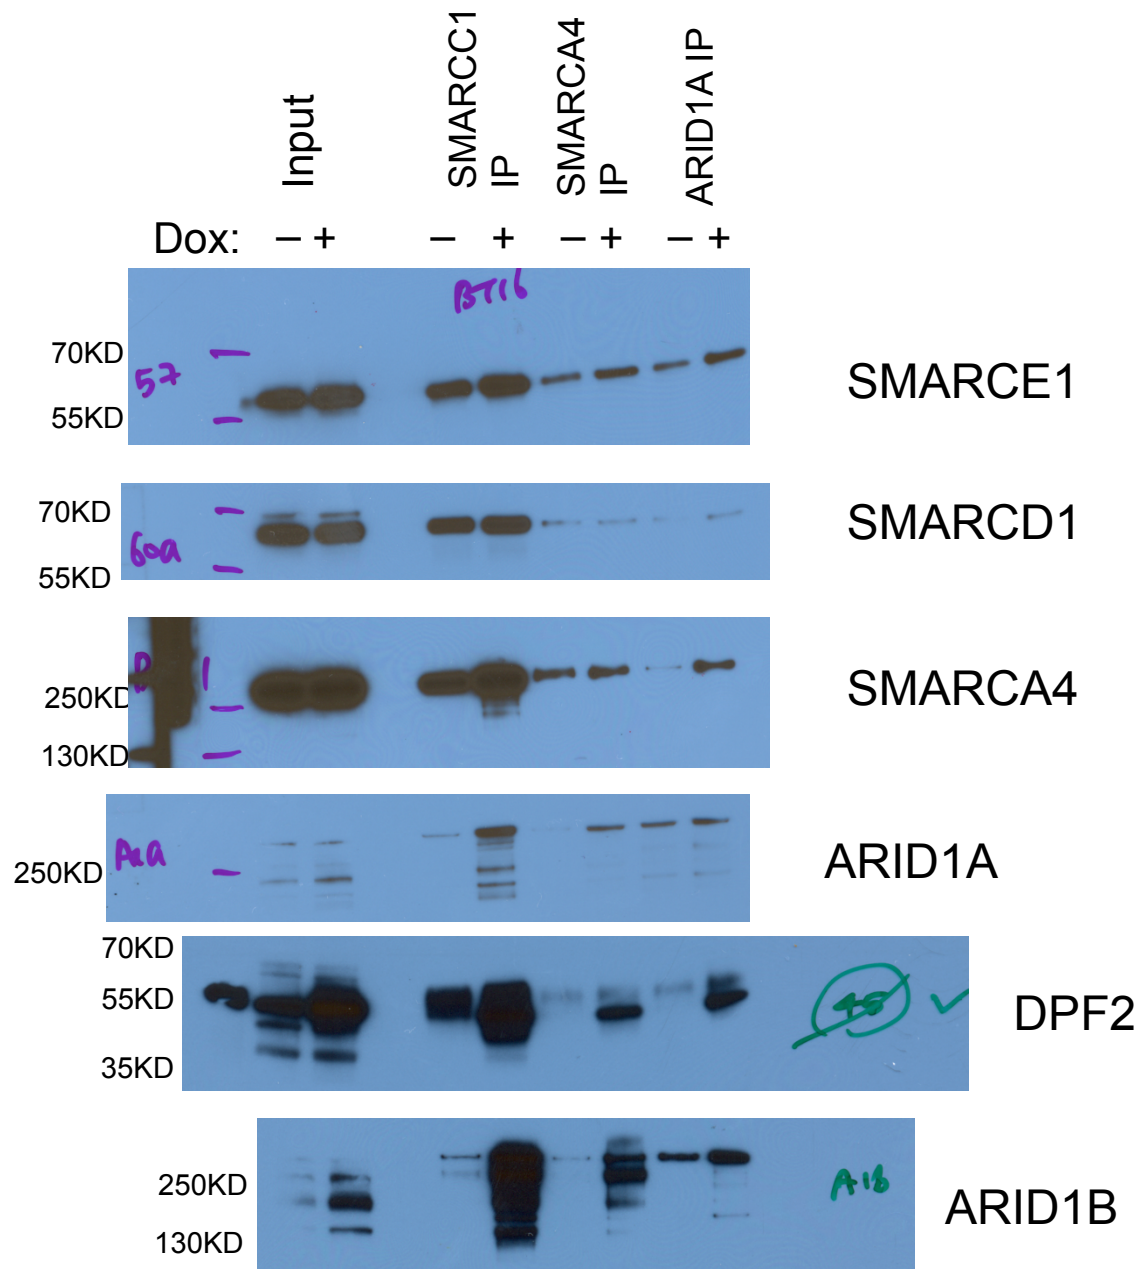

Figure 2b

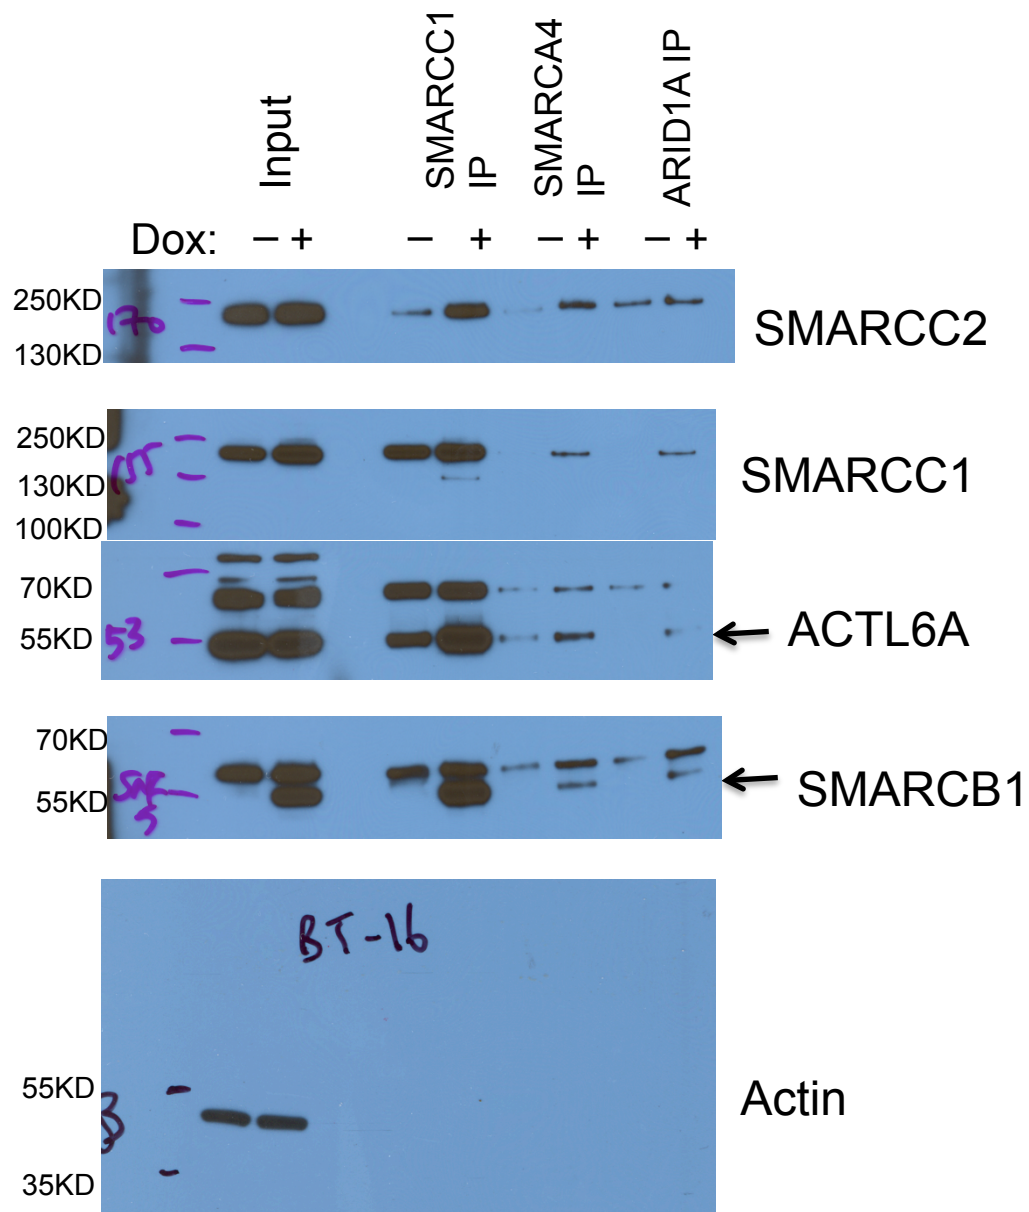

**Figure 2c**

**G401**

**Figure S2b**

**BT16**

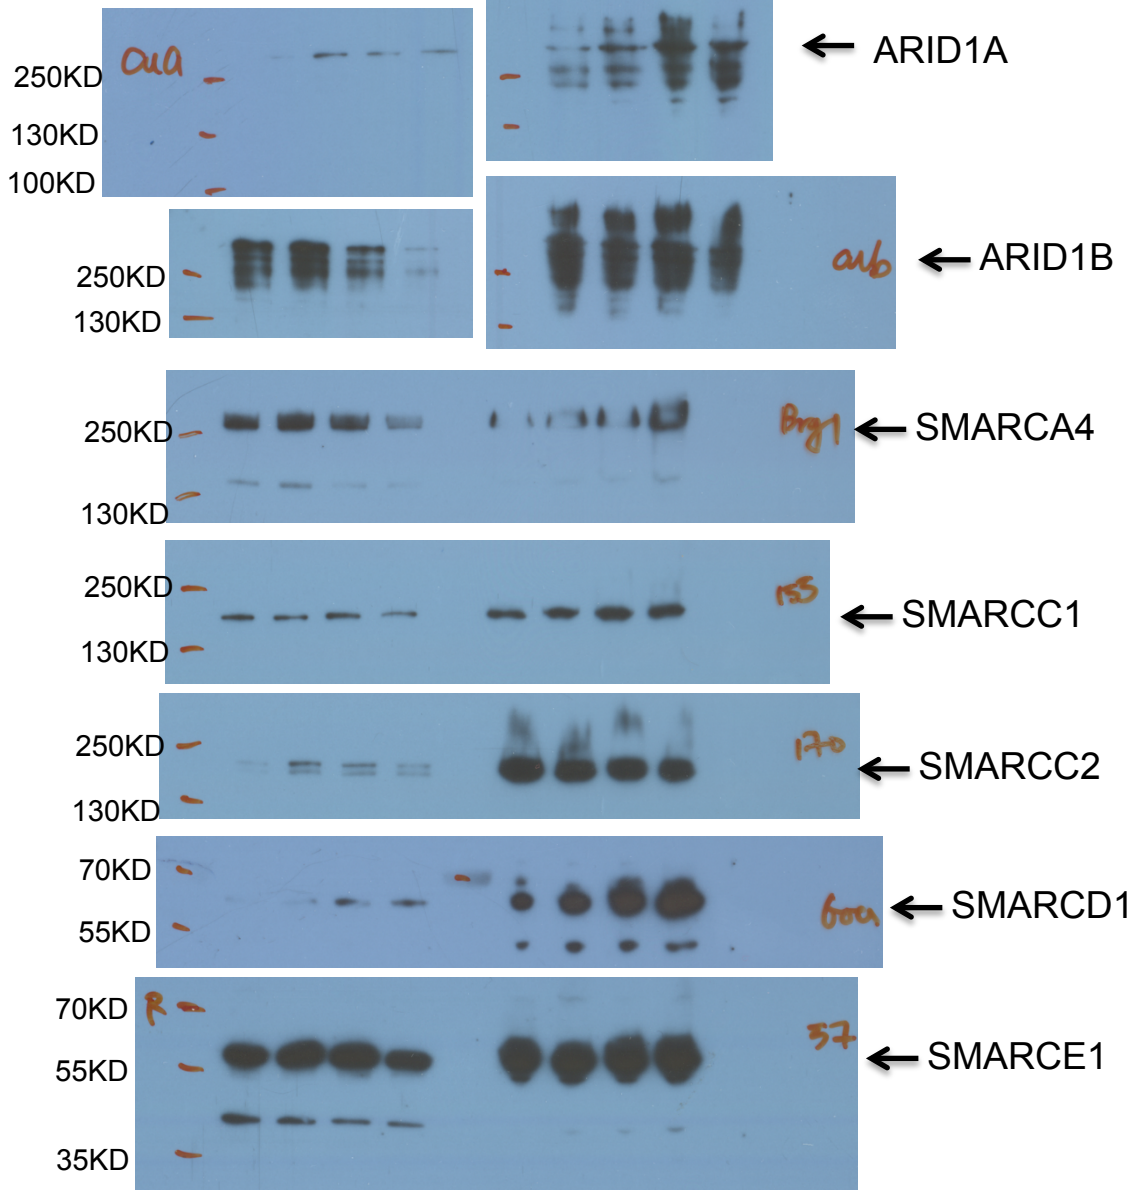

**Figure 2c**

**G401**

**Figure S2b**

**BT16**

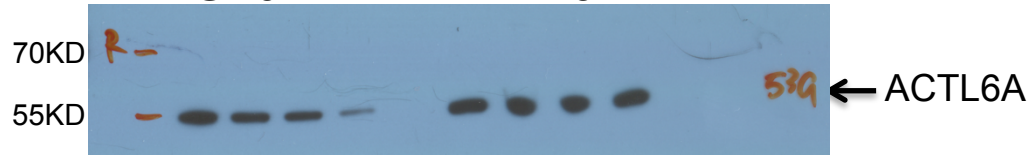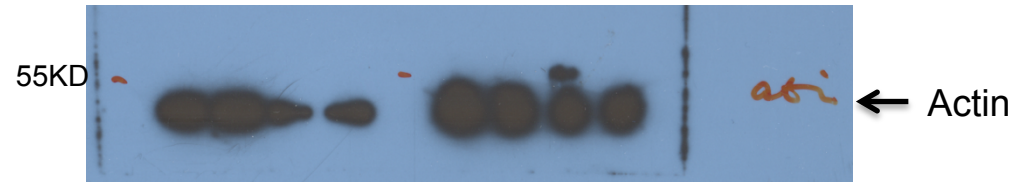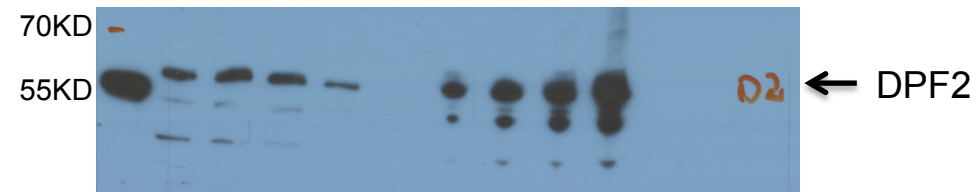

Figure 2e

Fraction: 1  24

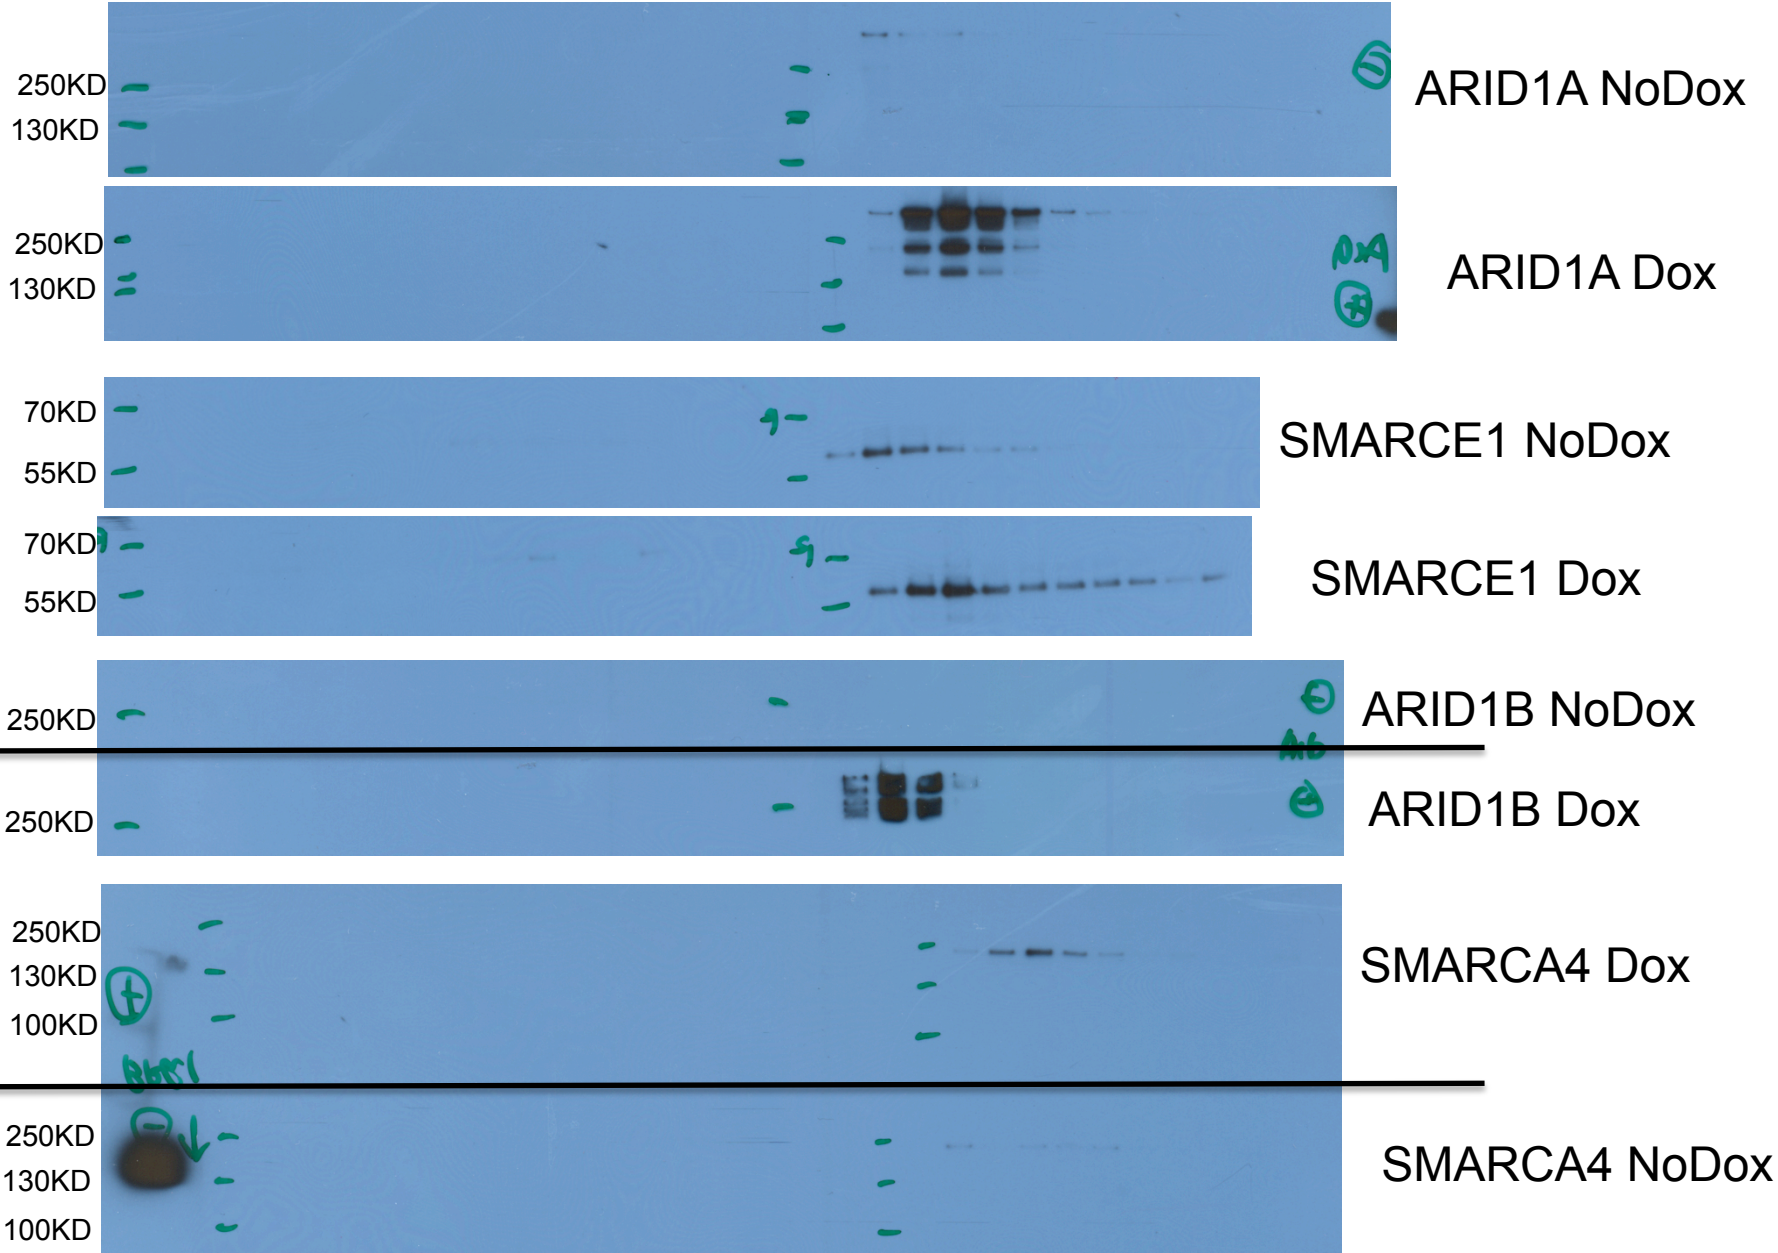

Fraction: 1

24

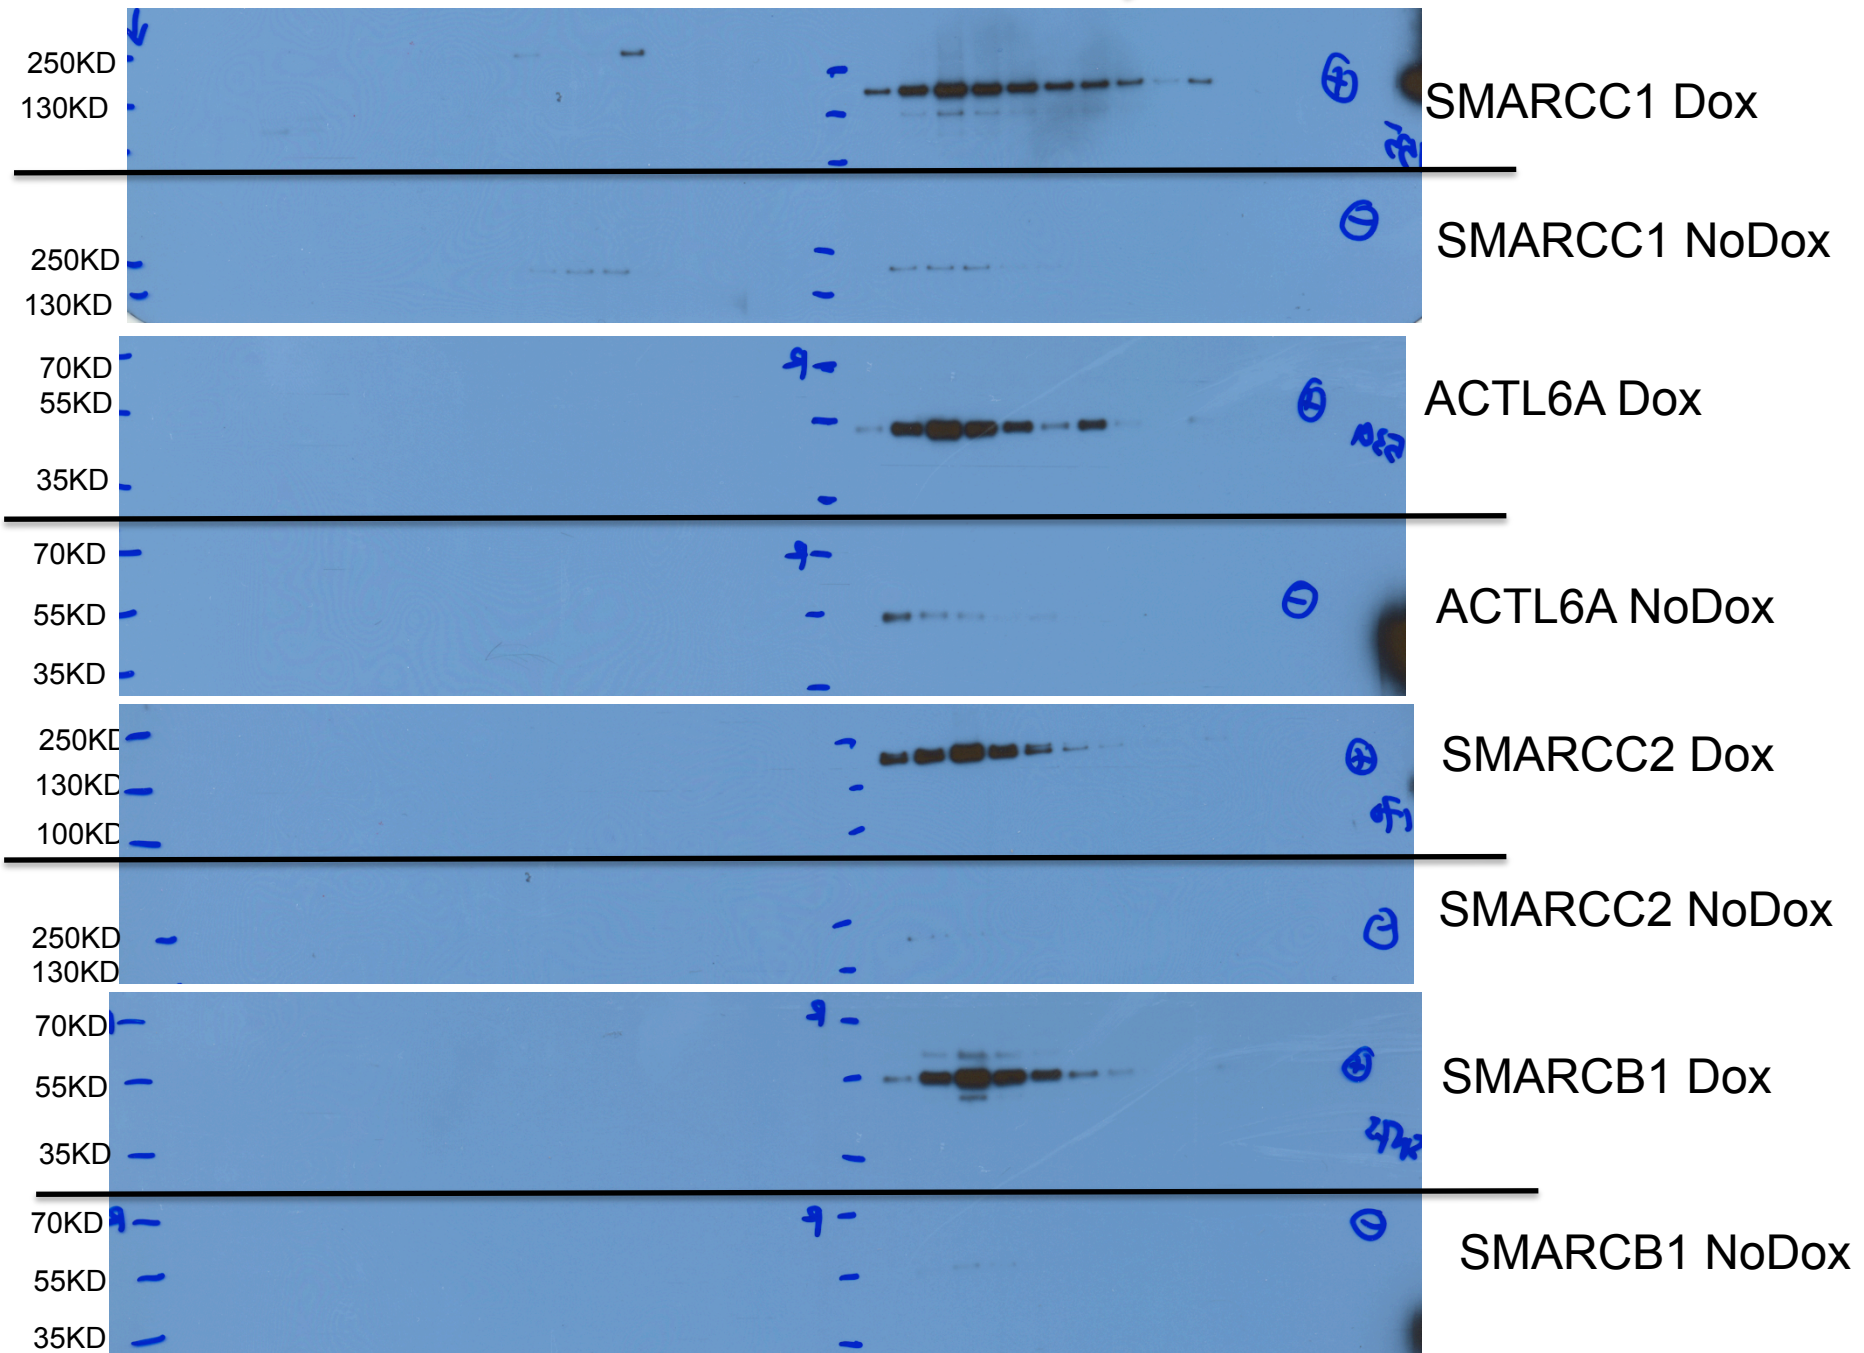



Figure 2e

Fraction: 1  24

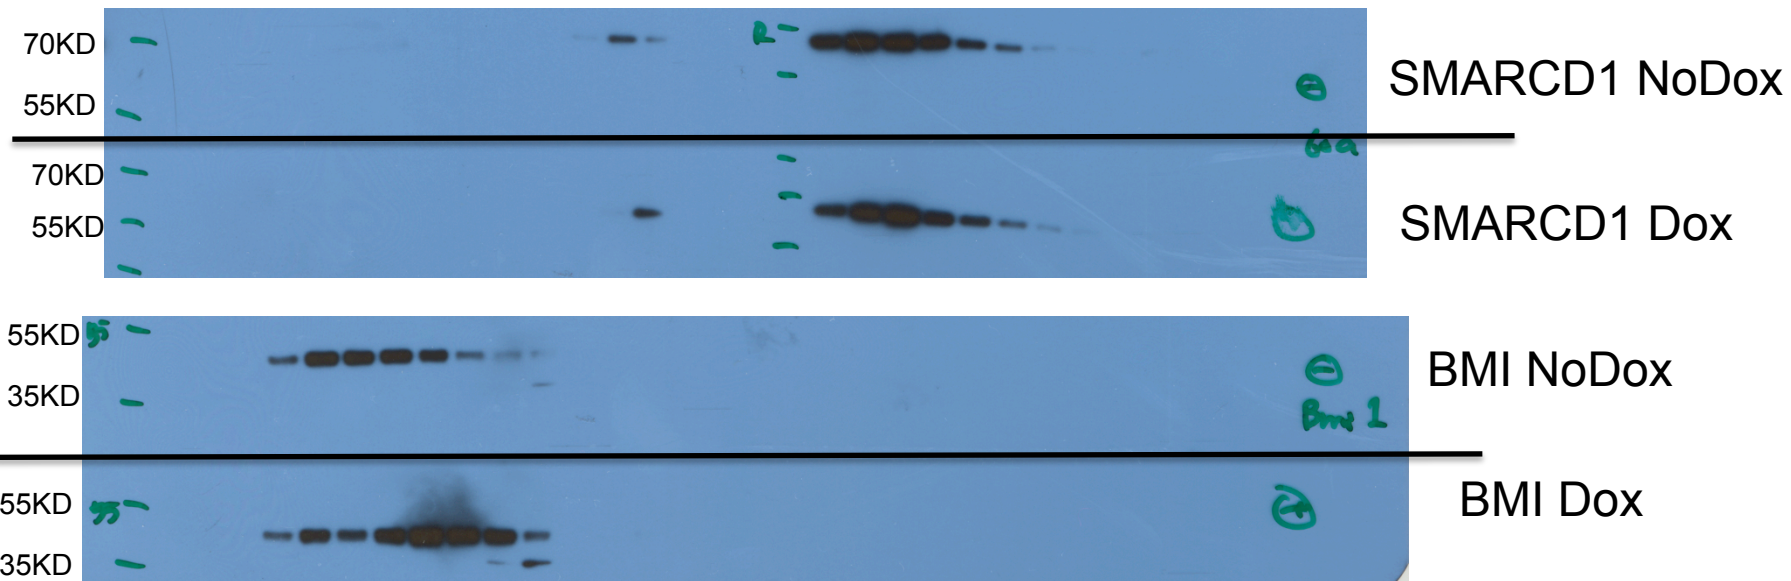

**Figure 2f**

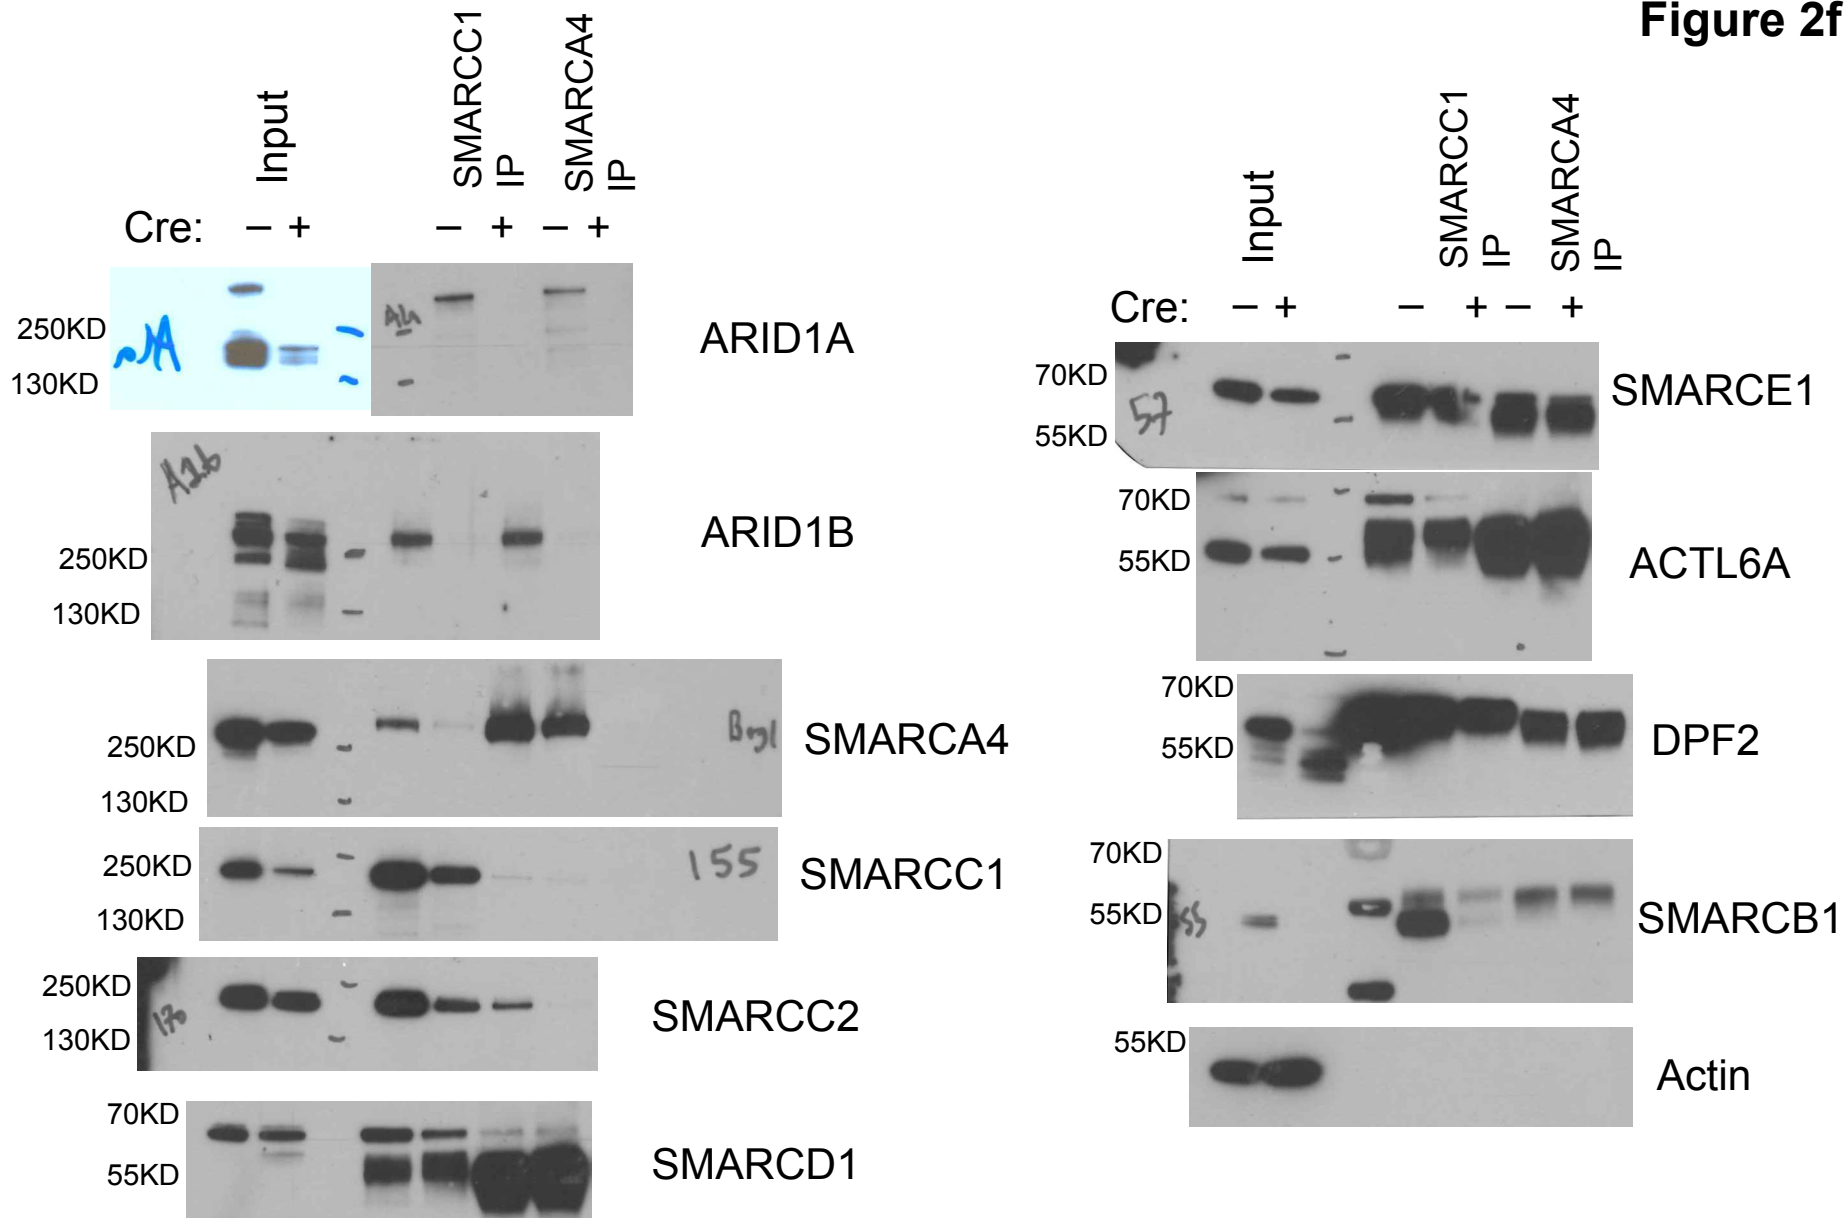

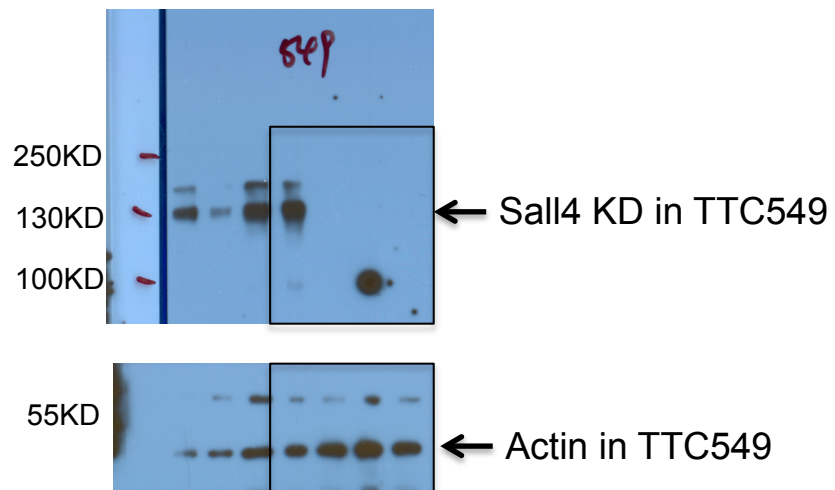

**Figure 4d**

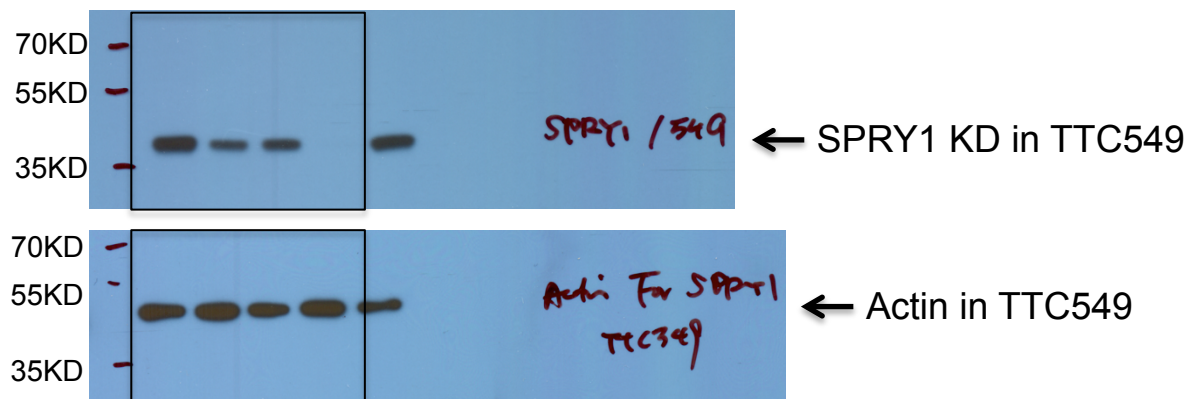

**Figure 4e**

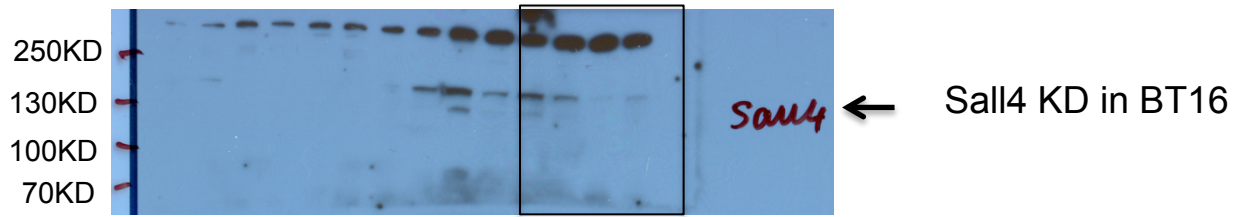

**Figure 4d**

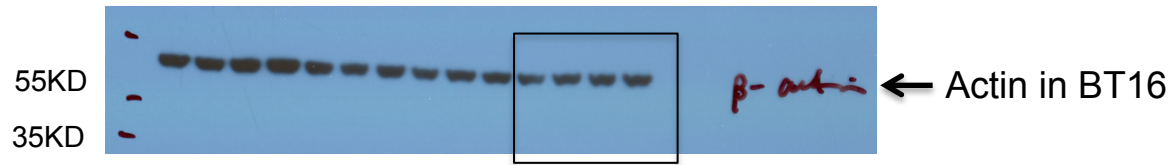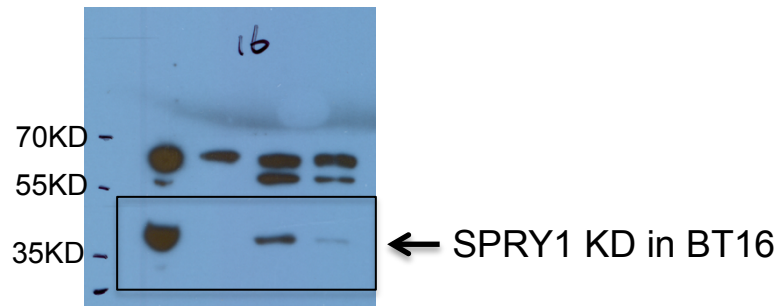

**Figure 4e**

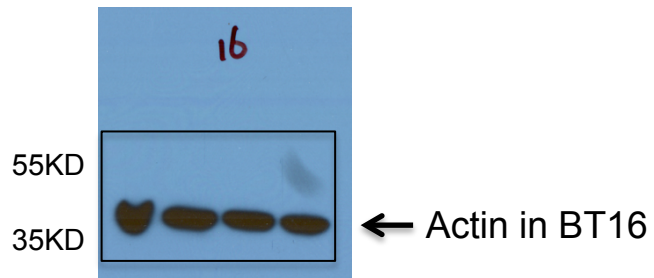

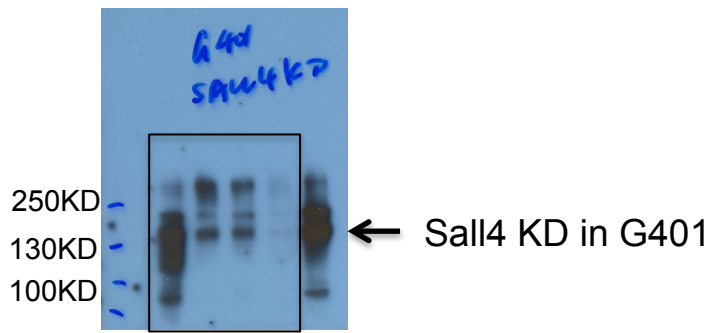

**Figure 4d**

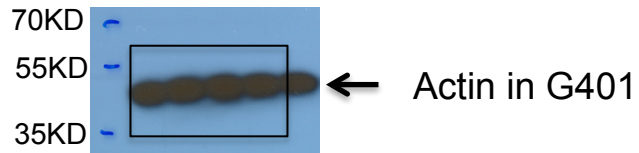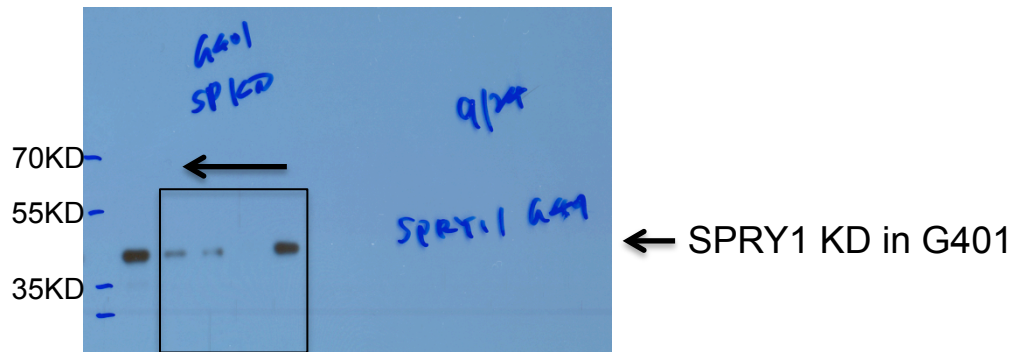

**Figure 4e**

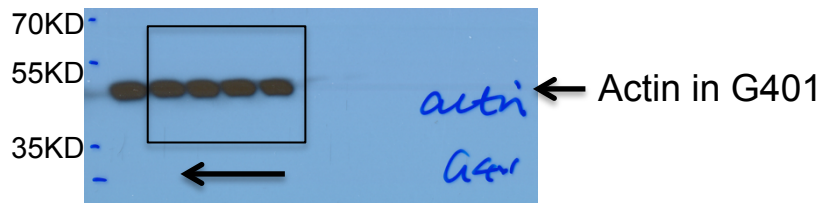

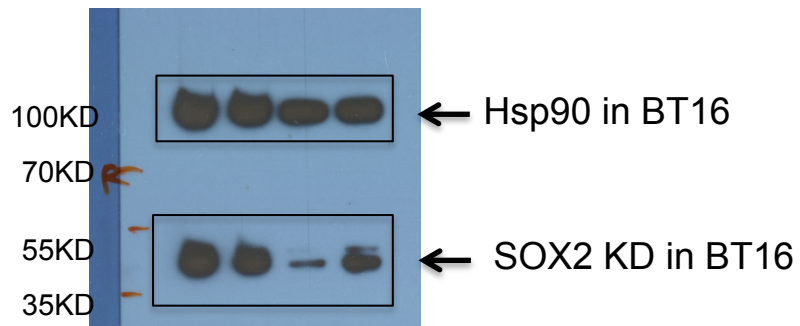

**Figure 4g**

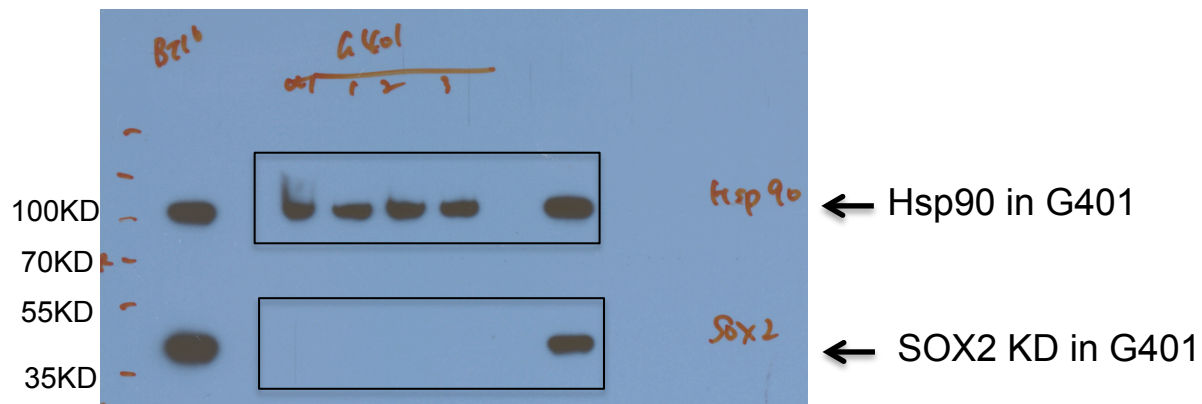

**Figure 4g**

Figure S2c

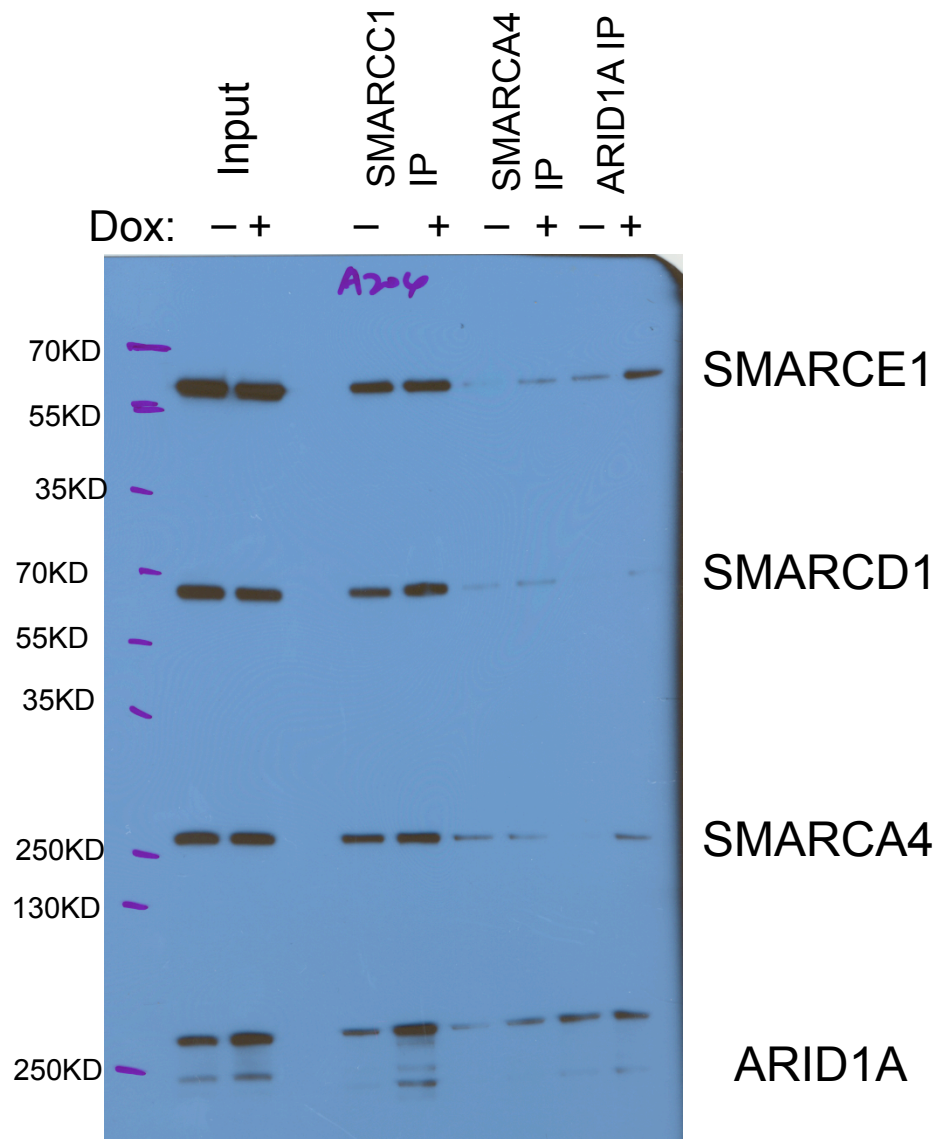





**Figure S2d**

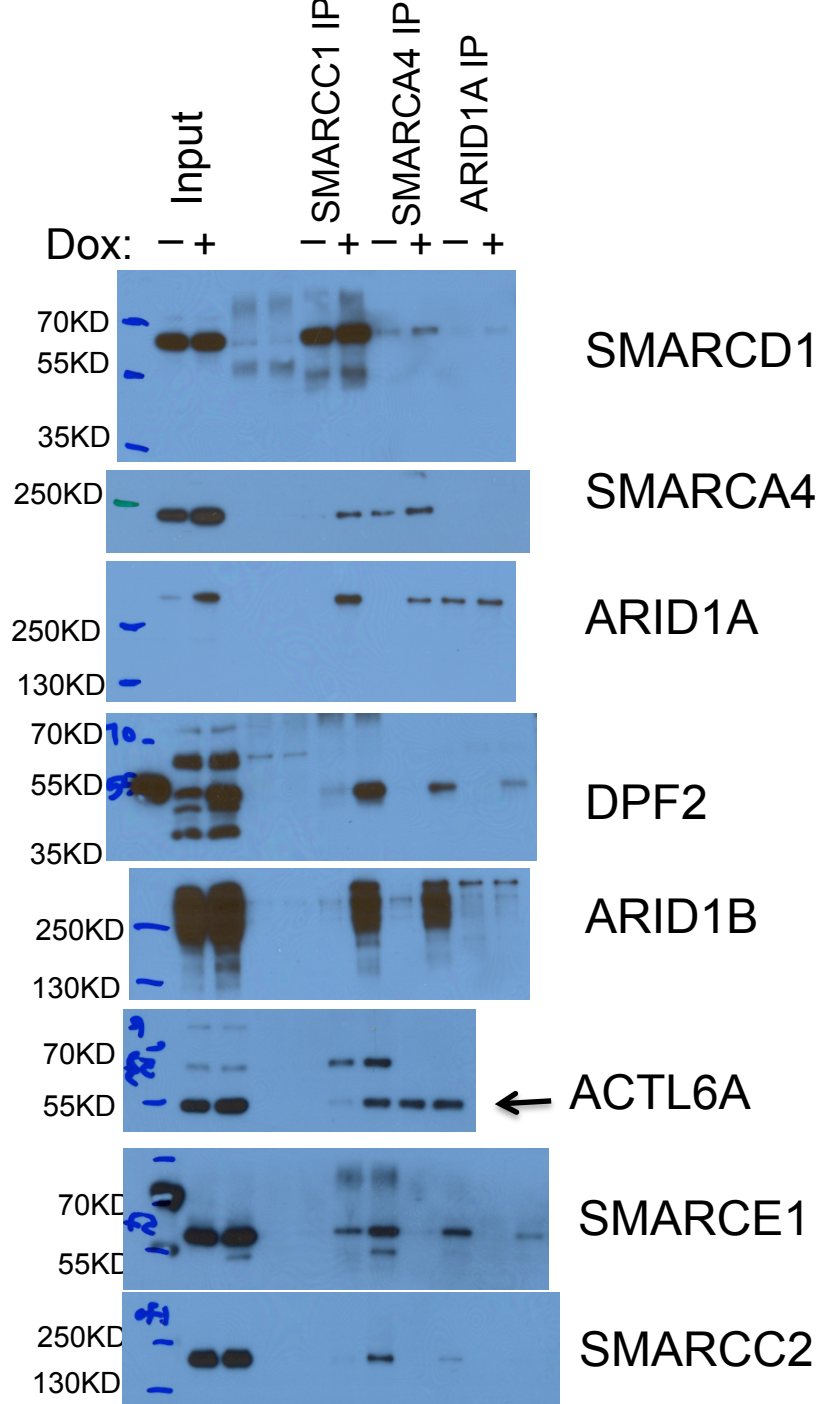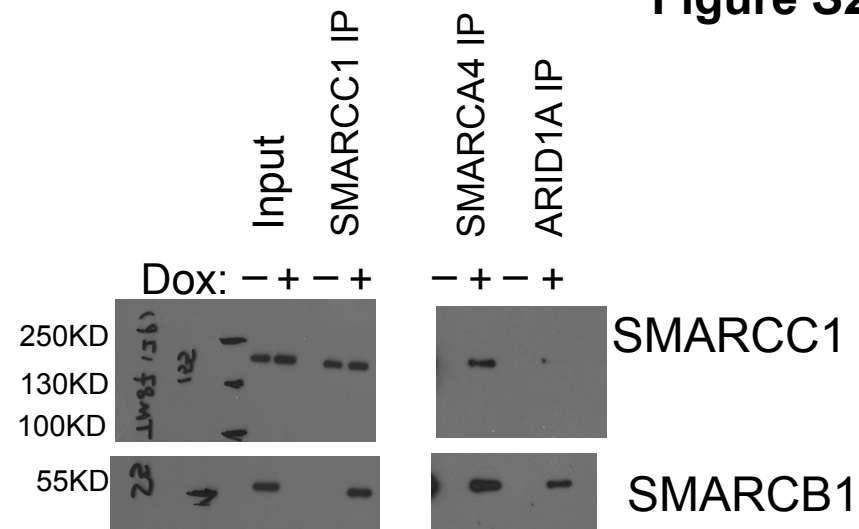

Figure S2e

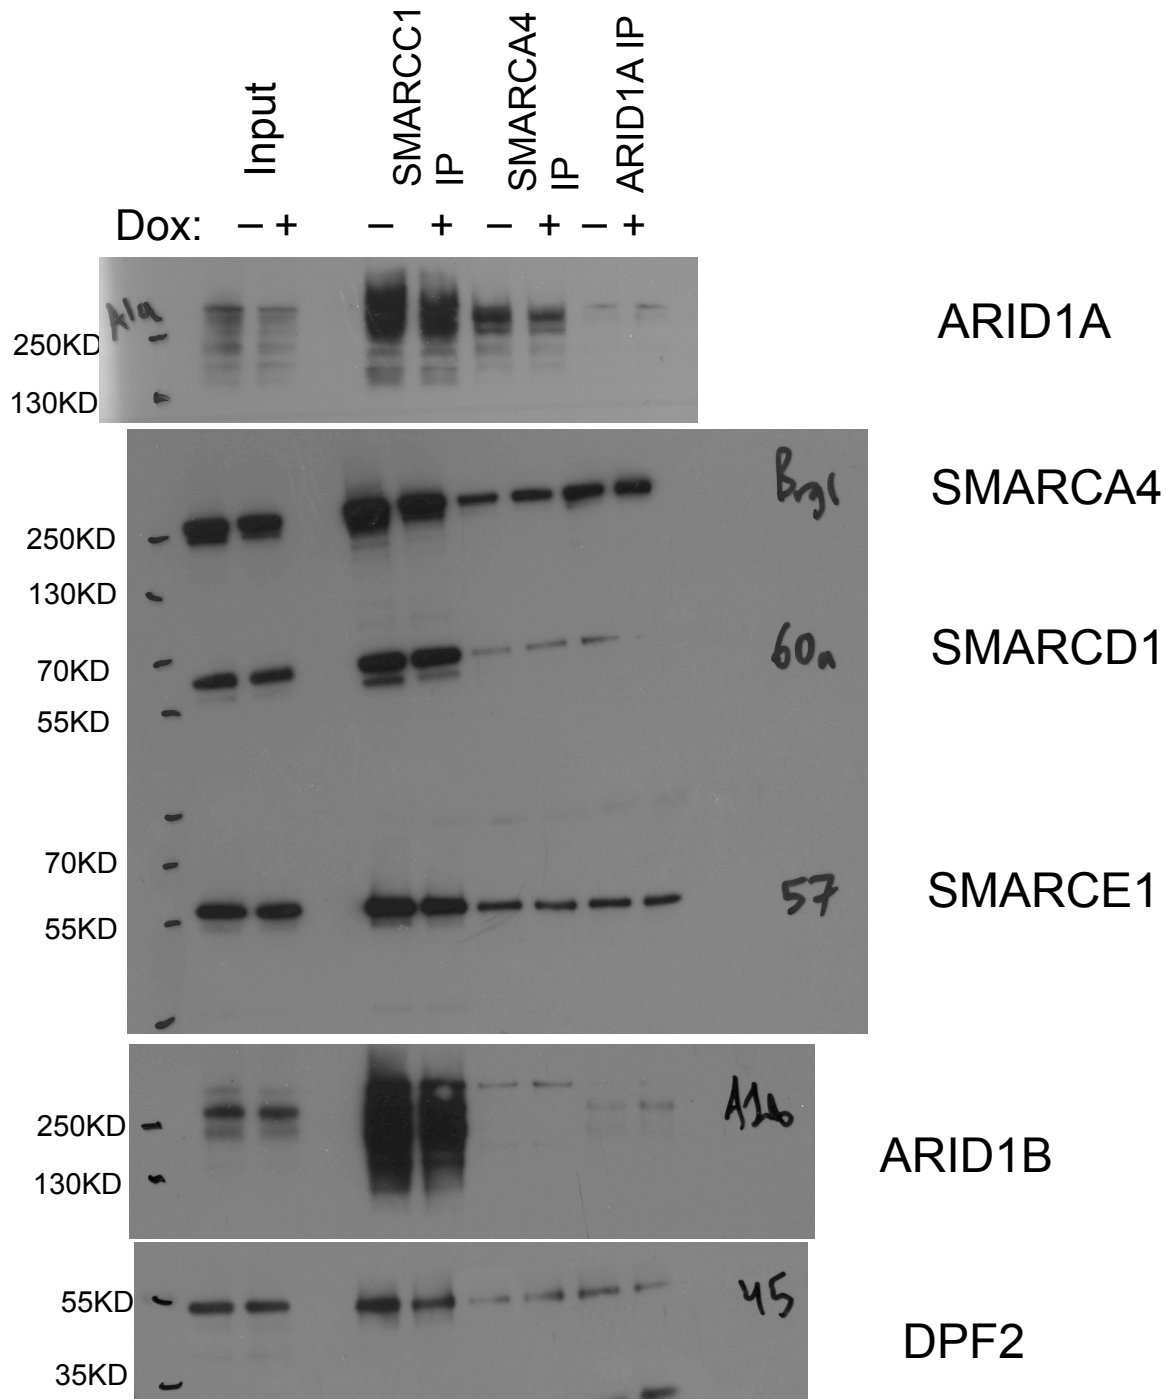

Figure S2e

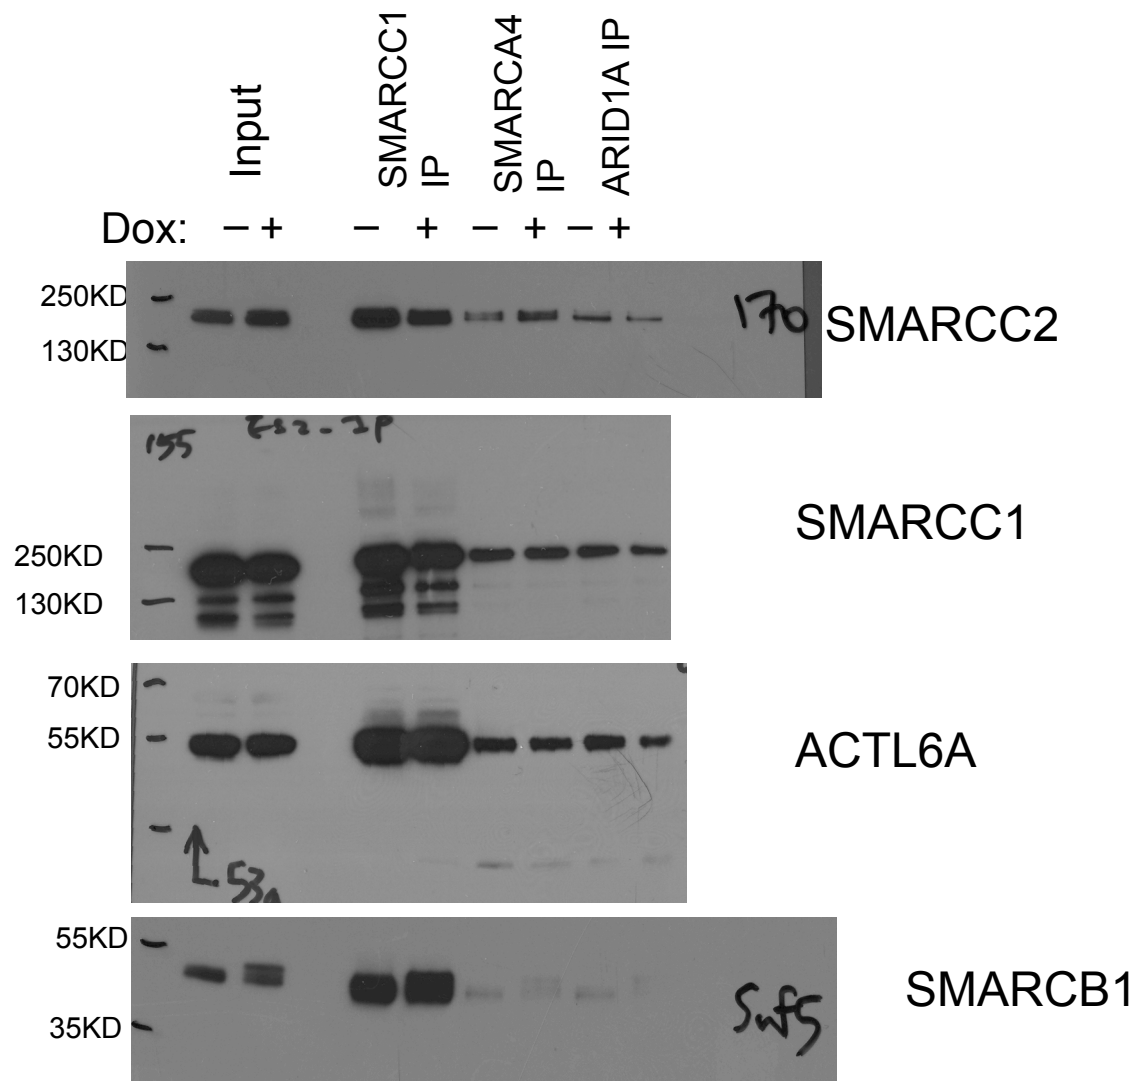

Figure S2g

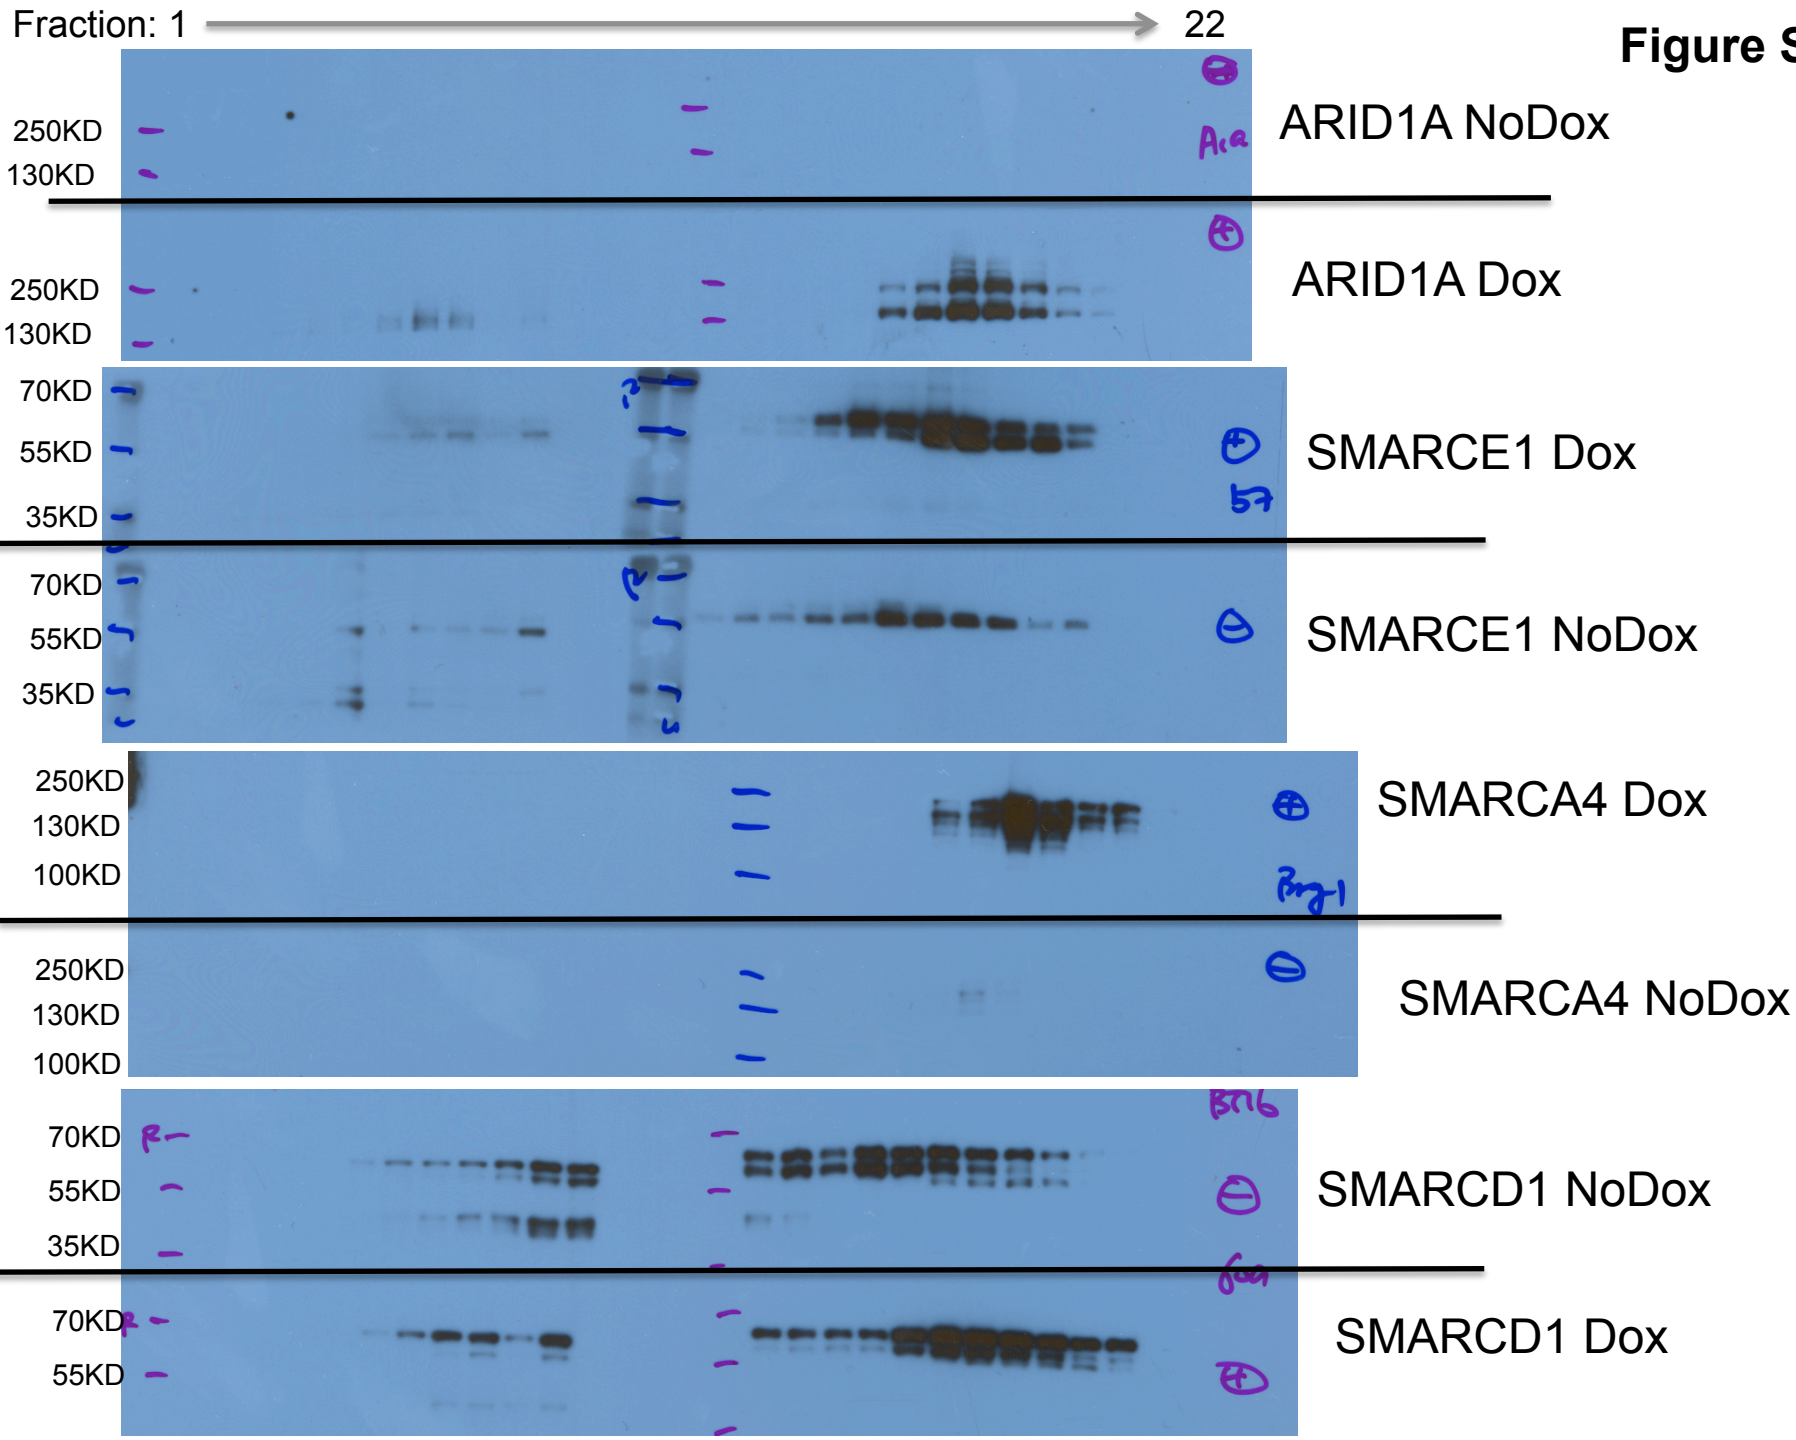

Figure S2g

Fraction: 1  22

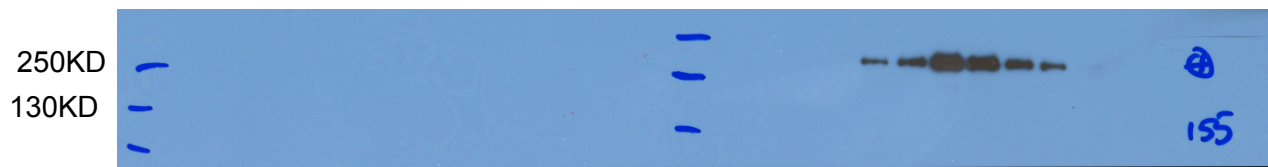

SMARCC1 Dox

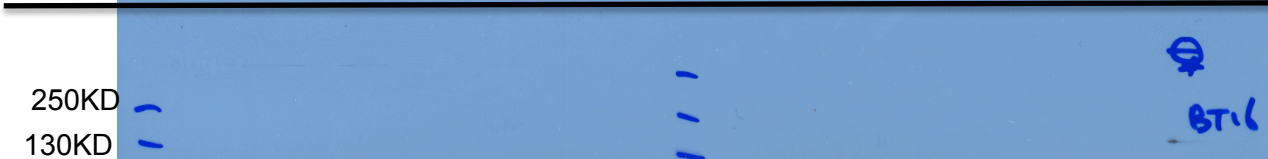

SMARCC1 NoDox

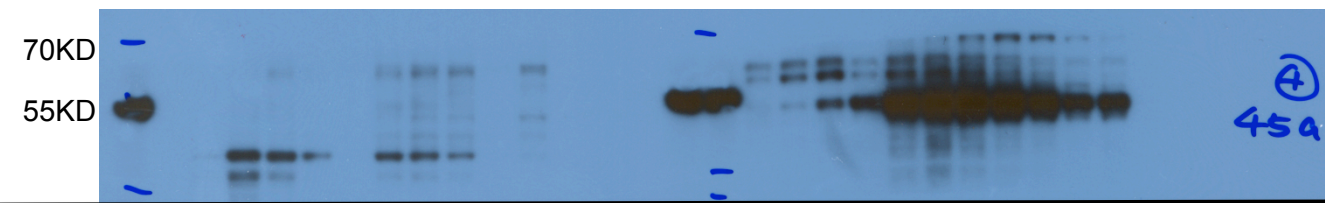

DPF2 Dox

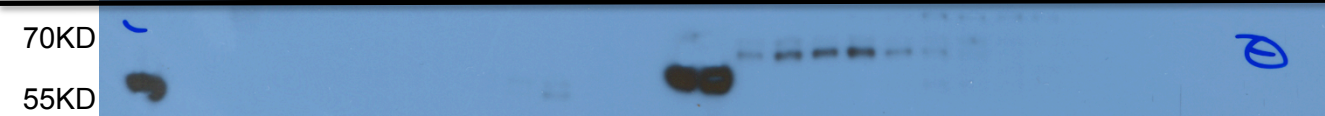

DPF2 NoDox

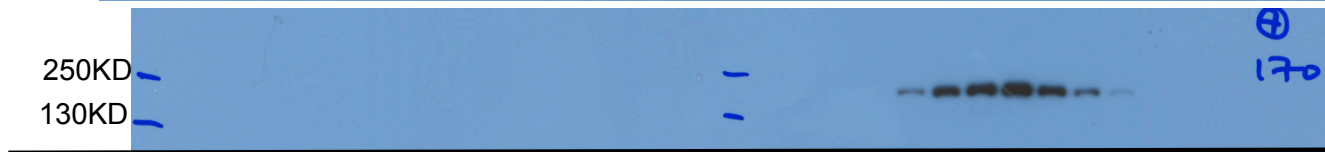

SMARCC2 Dox

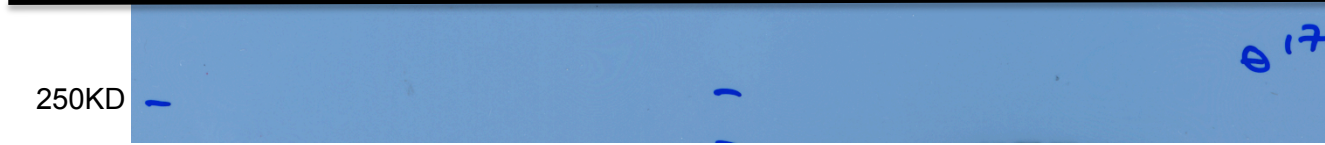

SMARCC2 NoDox

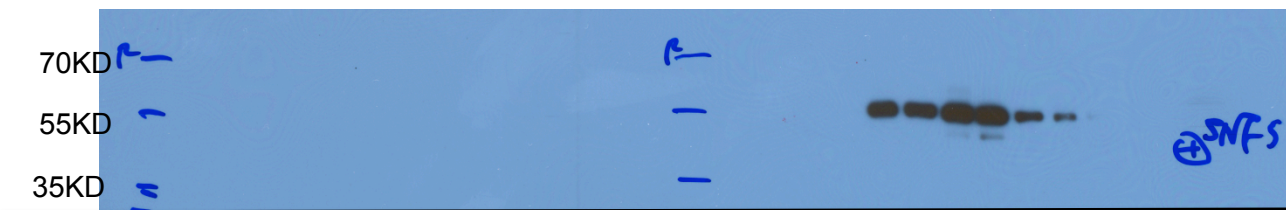

SMARCB1 Dox

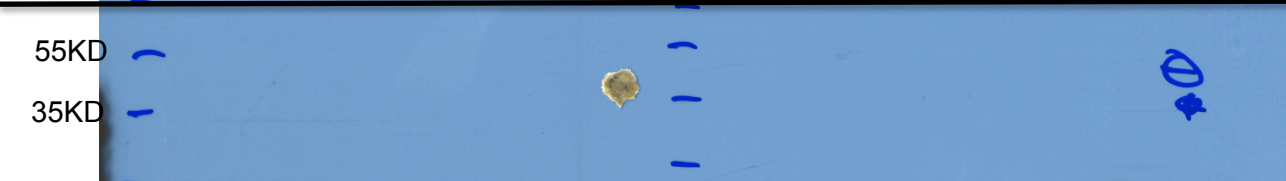

SMARCB1 NoDox
